# Supplementary material for: ICOS controls Foxp3+ regulatory T-cell expansion, maintenance and IL-10 production during helminth infection
Source: PubMed Central journal article supplement (PMC3615169; doi:10.1002/eji.201242794), 2013-01-14
Supplement: eji0043-0705-SD1.pdf [file eji0043-0705-SD1.pdf]

# European Journal of Immunology

**Supporting Information**

**for**

**DOI 10.1002/eji.201242794**

Stephen A. Redpath, Nienke van der Werf, Ana M. Cervera, Andrew S. MacDonald,  
David Gray, Rick M. Maizels  
and Matthew D. Taylor

**ICOS controls Foxp3<sup>+</sup> regulatory T-cell expansion, maintenance and IL-10  
production during helminth infection**

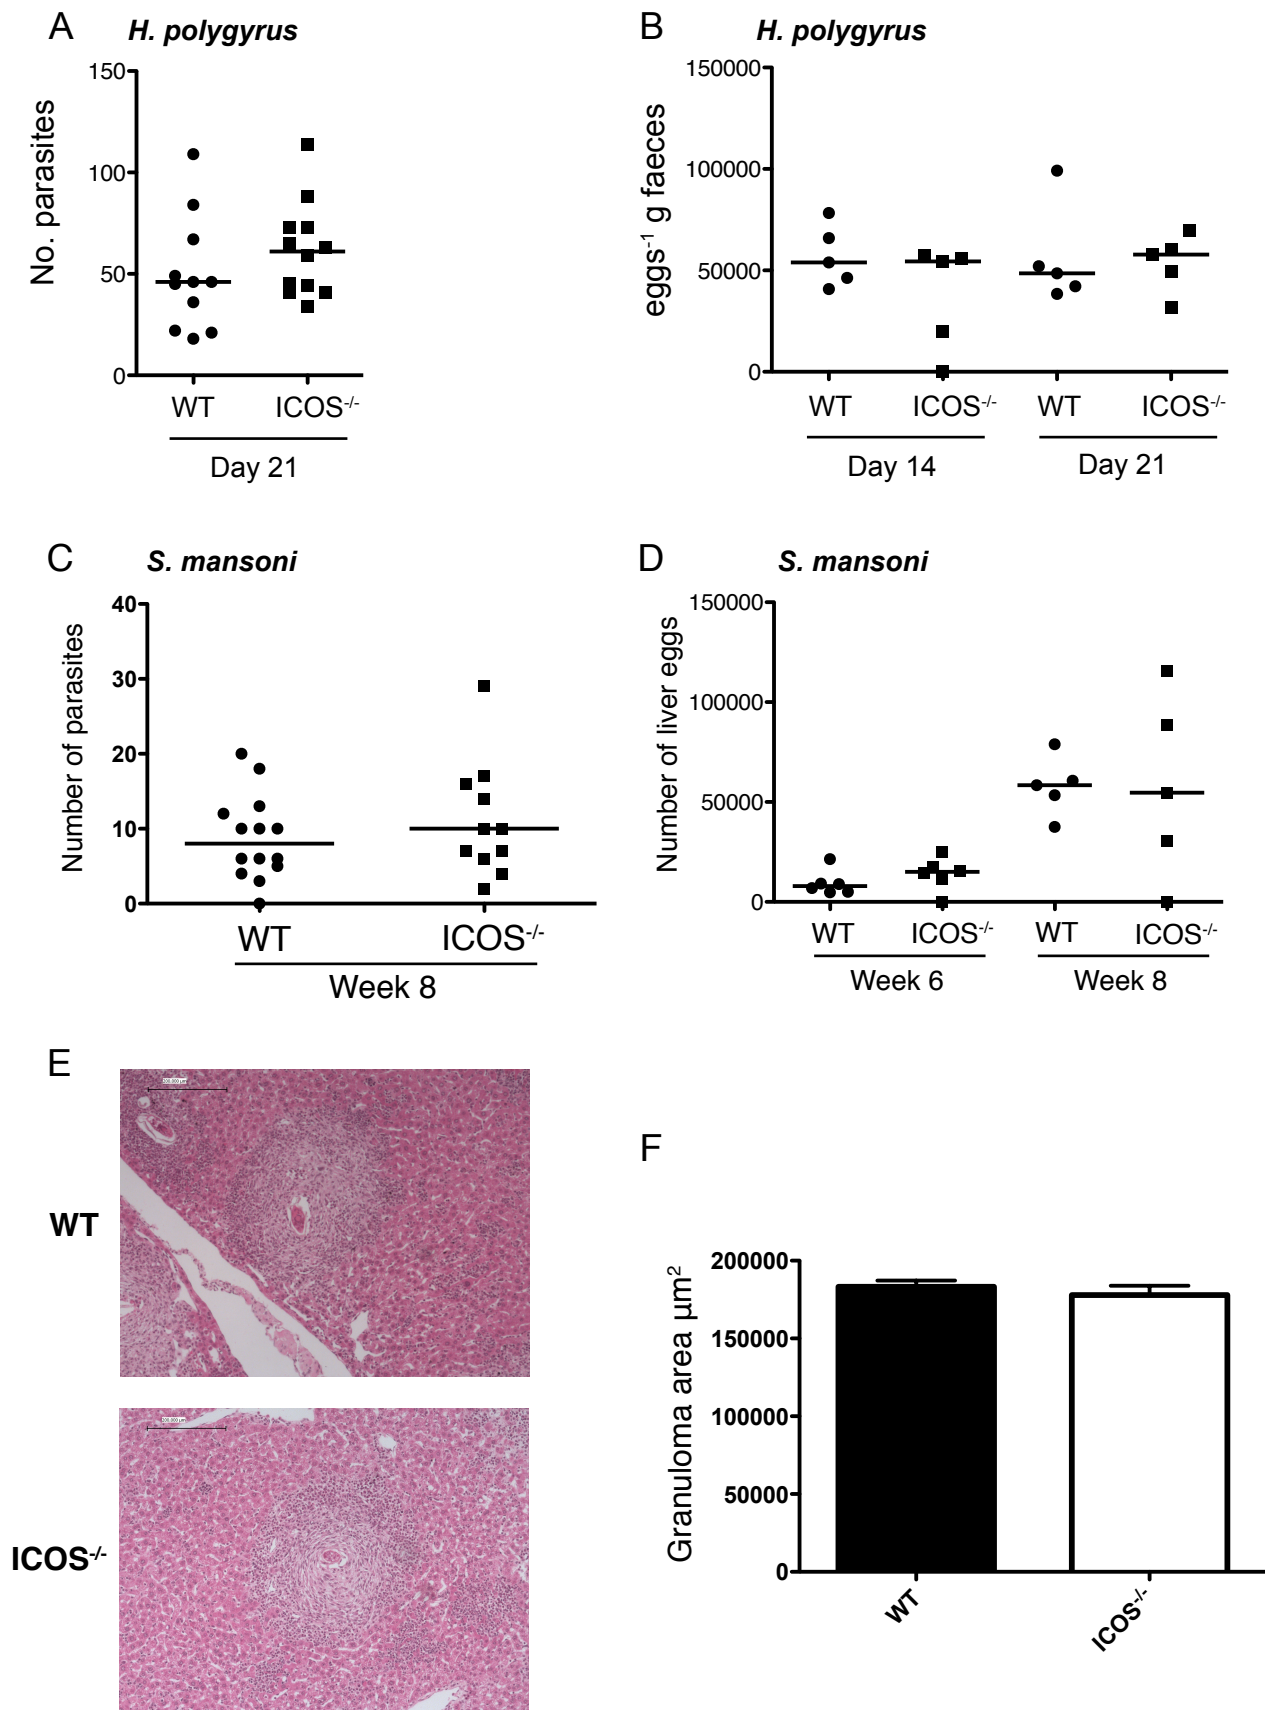

**Supplementary Figure 1. ICOS deficiency does not affect susceptibility to *H. polygyrus* or *S. mansoni* infections, or *S. mansoni*-mediated pathology.** (A-B) WT and ICOS<sup>-/-</sup> mice were infected with 200 *H. polygyrus* L3 larvae and the parasite burdens were assessed at d 21 (A), and the number of *H. polygyrus* eggs in the faeces were quantified at d 14 and d 21 (B). (C-F) WT and ICOS<sup>-/-</sup> mice were infected with 70 *S. mansoni* cercariae and the number of adult parasites quantified at wk 8 of infection (C), and the number of *S. mansoni* eggs in the liver were quantified at wk 6 and wk 8 pi (D). To measure granuloma size liver sections were stained with H & E and the area of immune infiltrate surrounding individual eggs was measured using a compound microscope and Leica analysis software. (E) Representative micrographs of *S. mansoni* egg induced granulomas. Scale bar = 200 $\mu\text{m}$  (F) Area in  $\mu\text{m}^2$  of hepatic granulomas. (A-D) Closed circles denote *H. polygyrus* or *S. mansoni* infected WT mice and closed squares denote *H. polygyrus* or *S. mansoni* infected ICOS<sup>-/-</sup> mice. Data points represent individual mice and bars show median values. (F) Bars depict mean and standard deviation. A & C show pooled data from 3 independent experiments. B shows data from one experiment. D - F show representative data from three independent experiments, two at wk 6, and one at wk 8.

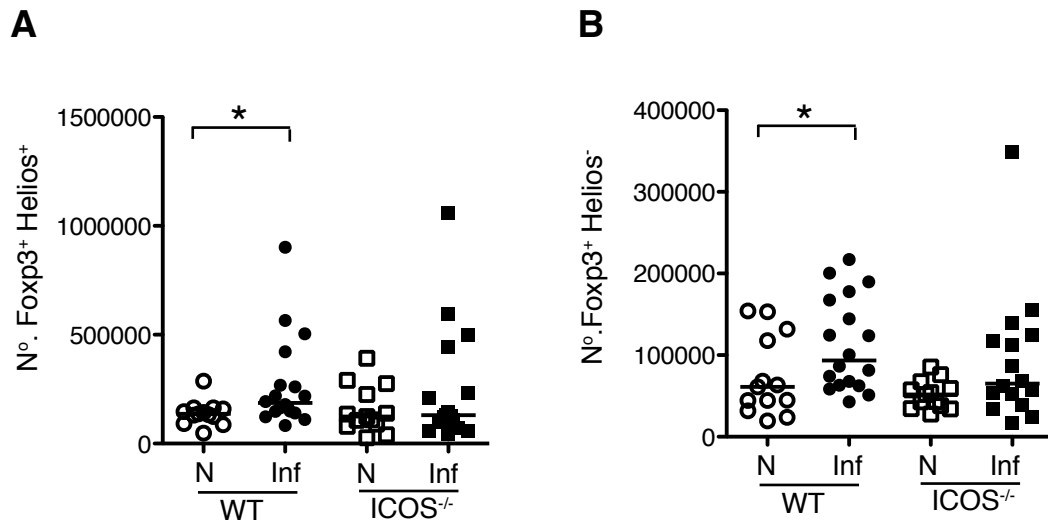

**Supplementary Figure 2. *H. polygyrus* infection expands both Helios<sup>+</sup> and Helios<sup>-</sup> Foxp3<sup>+</sup> Tregs in the MLN.** WT (circles) and ICOS<sup>-/-</sup> (squares) mice were infected with *H. polygyrus* and the number of Helios<sup>+</sup>Foxp3<sup>+</sup> (A) and Helios<sup>-</sup>Foxp3<sup>+</sup> Tregs (B) quantified in the MLN at d 7 pi. Open and closed symbols represent naive and infected mice respectively. Panels show combined data from three independent experiments. Lines denote means. \* p < 0.05 (Tukey's HSD, ANOVA performed on combined data from three independent experiments).

**A** LP CD4<sup>+</sup> T cells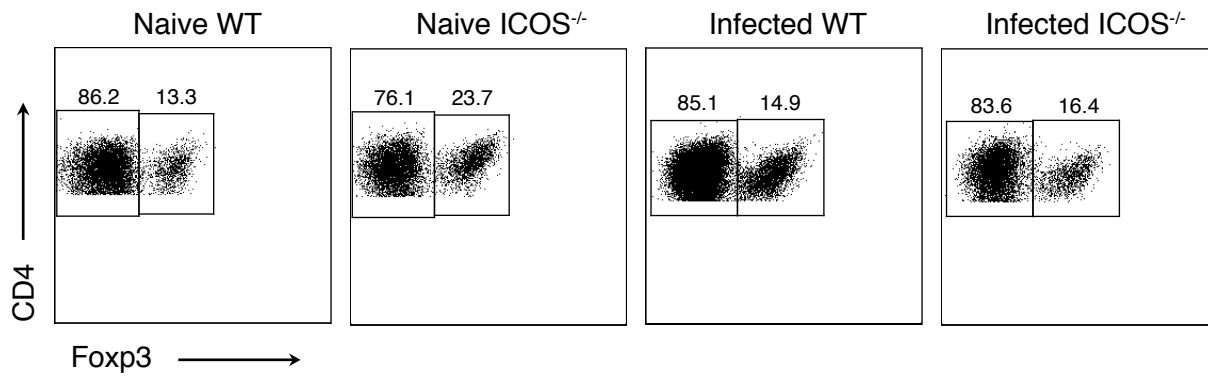**B** LP CD4<sup>+</sup>Foxp3<sup>+</sup> T cells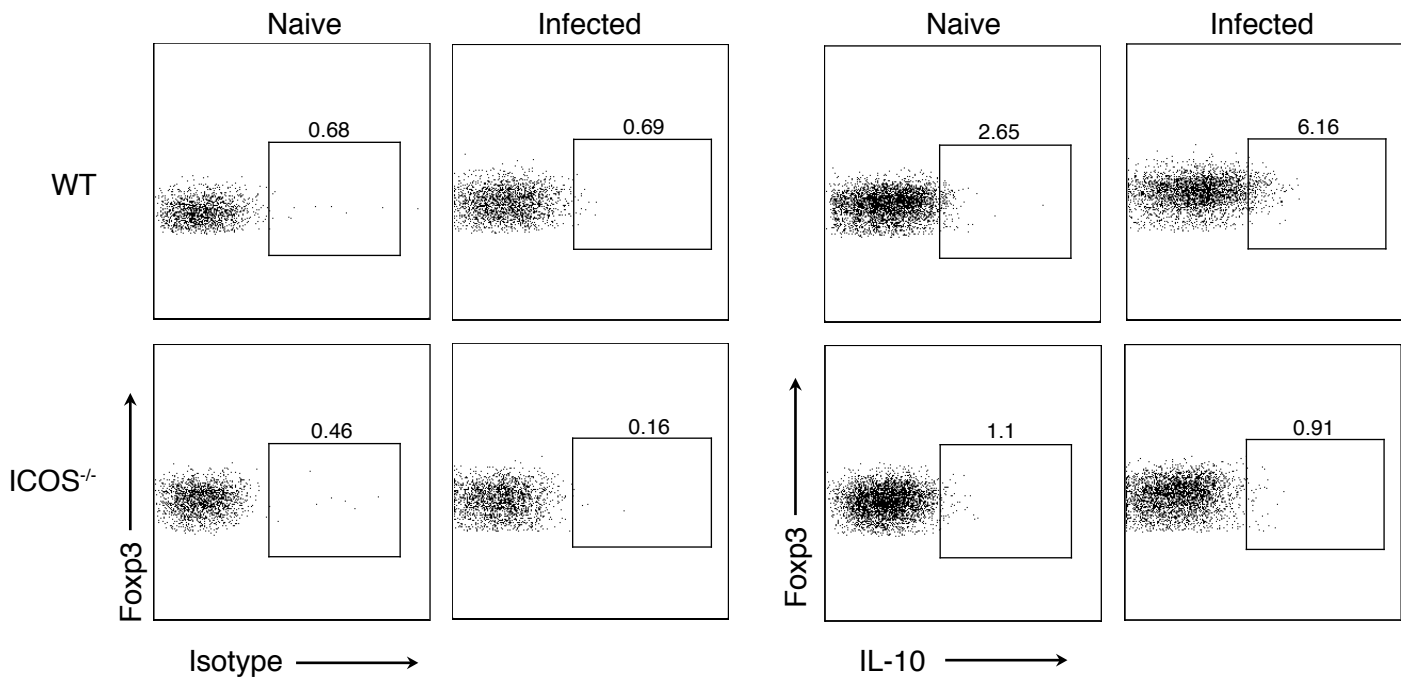**C** LP CD4<sup>+</sup>Foxp3<sup>-</sup> T cells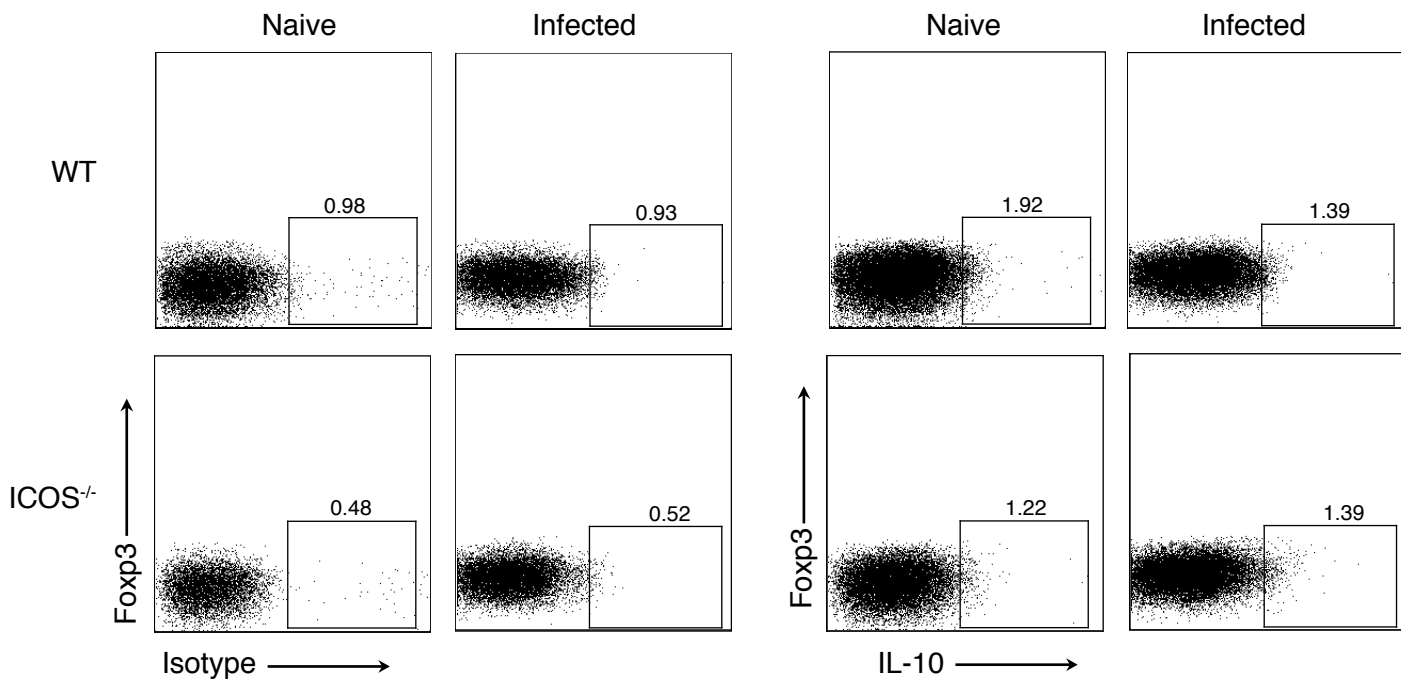

**Supplementary Figure 3. Representative FC staining for Foxp3 and IL-10 on LP CD4<sup>+</sup> T cells.** LP cells were isolated from naive and *H. polygyrus* infected mice 7 d pi, stimulated with PMA and ionomycin, and stained for CD4, Foxp3, and IL-10. (A) Gating strategy identifying CD4<sup>+</sup>Foxp3<sup>+</sup> Tregs and CD4<sup>+</sup>Foxp3<sup>-</sup> Teff cell populations. (B) Representative staining for Foxp3 versus IL-10 on CD4<sup>+</sup>Foxp3<sup>+</sup> Tregs. (C) Representative staining Foxp3 versus IL-10 on CD4<sup>+</sup>Foxp3<sup>-</sup> Teff cells.
